# Supplementary material for: Nanosorbcats of methylene blue on novel Fe2O3 nanorods for photocatalytic water oxidation
Source: Royal Society of Chemistry journal article supplement (doi:10.1039/c6ra16049b), 2016-01-01
Supplement: c6ra16049b1.pdf [file c6ra16049b1.pdf]

Supporting information

## Nanosorbcats of methylene blue on Novel Fe<sub>2</sub>O<sub>3</sub> nanorods for photocatalytic water oxidation

Qiu-Yun Chen,<sup>\*a</sup> Dong-liang Huang,<sup>a</sup> Yin-Bing Wang,<sup>a</sup> Jian Shao,<sup>a</sup> Ling-Ling Qu<sup>\*a,b</sup>

<sup>a</sup> School of Chemistry and Chemical Engineering, Jiangsu University, Zhenjiang, 212013,

P.R.China. E-mail: chenqy@ujs.edu.cn

<sup>b</sup> State Key Laboratory of Coordination Chemistry, School of Chemistry and Chemical

Engineering, Nanjing University, Nanjing 210093, P.R. China. E-mail: llqu@ujs.edu.cn

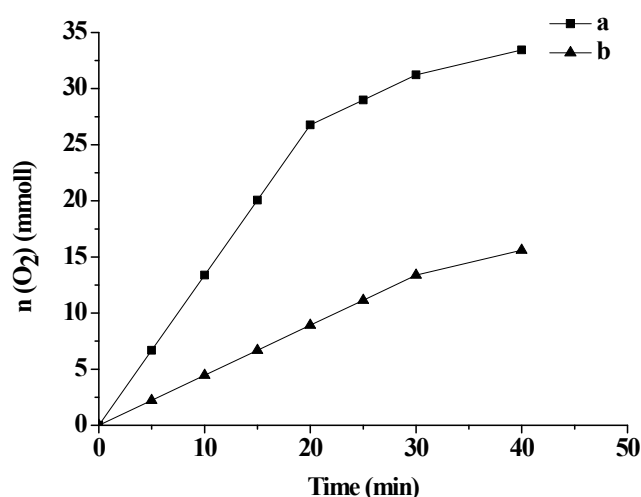

**Fig.S1.** (a) Water oxidation activity of MB@pfa@Fe<sub>2</sub>O<sub>3</sub> (5 mg) in water (5 ml) at 298 K, and irradiated with red LED light (10 W). (b) water oxidation activity of pfa@Fe (5 mg) in the presence of Ru<sup>II</sup>(bpy)<sub>3</sub><sup>2+</sup> (0.1 M, 200 μL) in water (5 ml) at 298 K, and irradiated with red LED light (10 W).

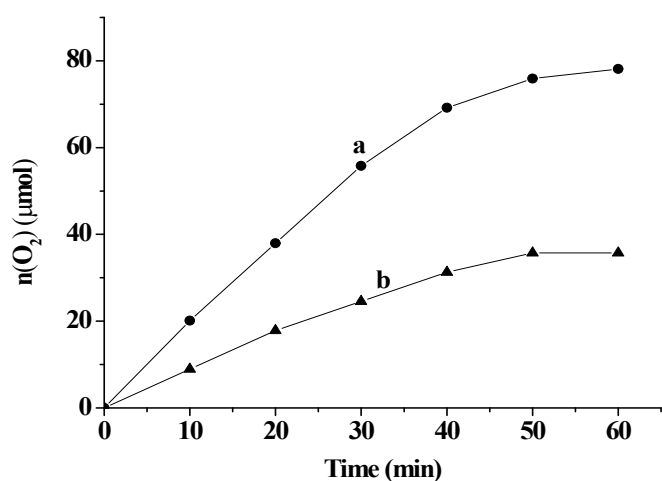

**Fig.S2.** Water oxidation activity of MB@pfa@Fe<sub>2</sub>O<sub>3</sub> (10 mg) in water solution ( 5 ml) at 298 K.

a) irradiated with red LED light (10 W); b) irradiated with blue LED light (10 W).

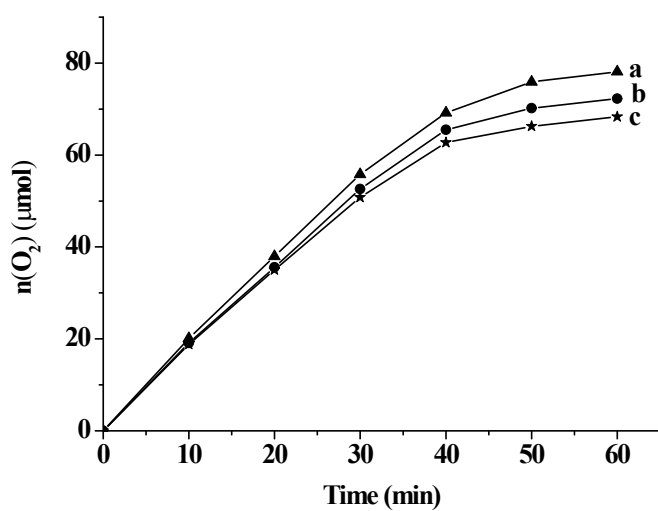

**Fig. S3** Water oxidation of MB@pfa@Fe<sub>2</sub>O<sub>3</sub> in three consecutive runs. (a: first run; b: second run;

c: third run).
